# Supplementary material
Source: PubMed Central journal article supplement (PMC8084946)
Supplement: NIHMS1666235-supplement-2.pdf [file NIHMS1666235-supplement-2.pdf]

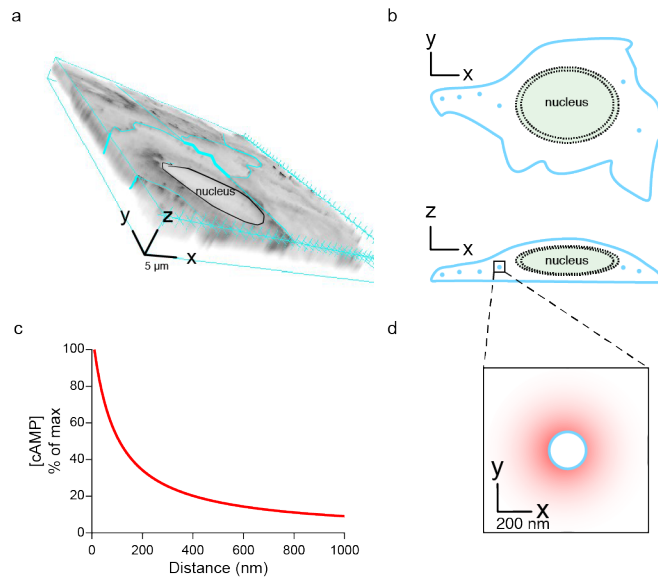

**Supplementary Figure 1.** Explicit statement of the problem. In order for cAMP production from endosomes to communicate signaling to the nucleus based on location, rather than by generating a sustained elevation of global cytoplasmic cAMP concentration, the concentration gradient resulting from local cAMP production must be communicated spatially downstream. This is problematic because the distance scale of local concentration gradients is inherently shorter than the typical distance between endosomes and the nucleus. **a**, 3D projection of a HEK293 cell monolayer for perspective, highlighting the plasma membrane and endosomes using the membrane adenylyl cyclase isoform 9 (ADCY9) that is present in both compartments. **b**, Schematic of this distribution in xy and xz projections, with endosomes drawn to scale relative to the overall cellular size. **c**, The local cAMP concentration gradient as a function of distance, as predicted by Fick's law at steady state ( $\nabla^2 C = \partial C / \partial t = 0$ ) and assuming spherical symmetry. In this condition, [cAMP] varies inversely with the distance,  $d$ , from the surface of the endosome of radius,  $r$ , as  $r / (d + r)$ . Plotted is this relationship for a spherical endosome 200 nm in diameter ( $r = 100$  nm). **d**, Illustration of the spatial disconnect at a cellular distance scale. The local cAMP gradient falls off two or three orders of magnitude too steeply to reach the nucleus.

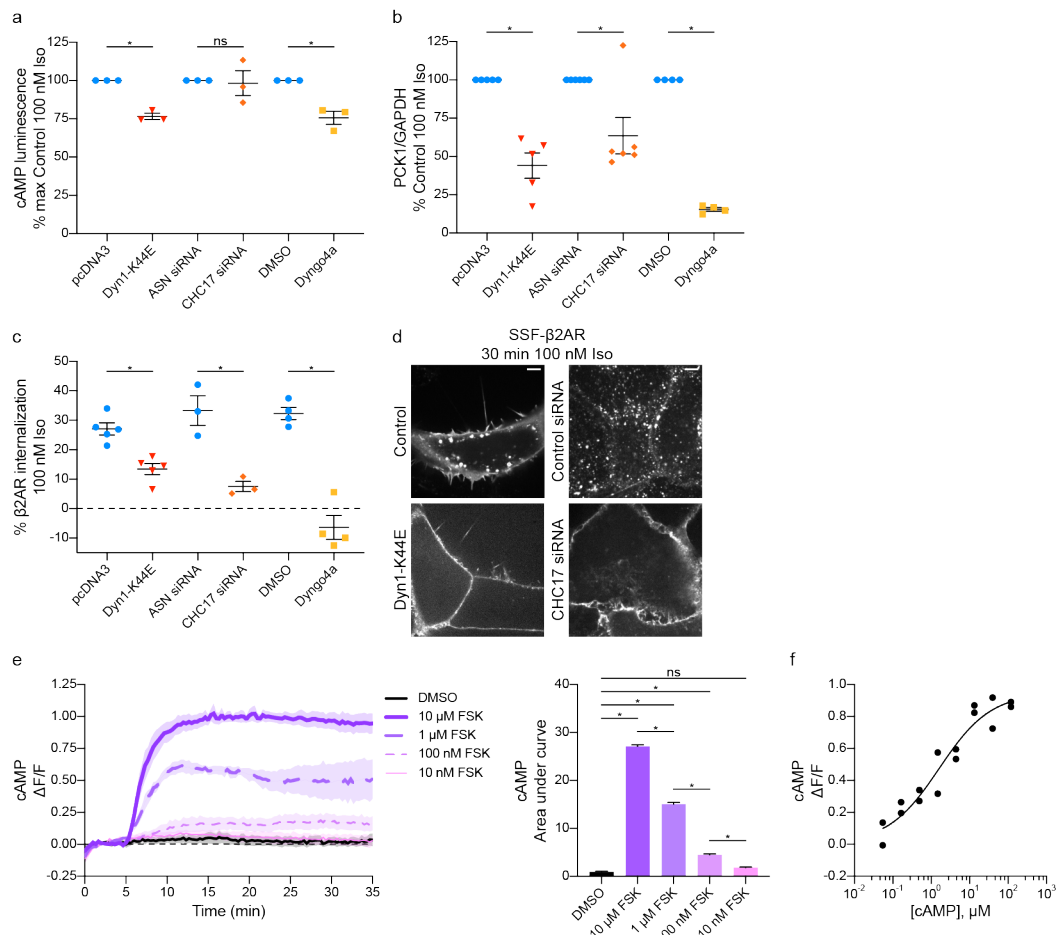

**Supplementary Figure 2.** Validation and characterization of endocytic blockade methods and GG4B cAMP biosensor. **a-c**, Cells stably expressing cAMP luminescence biosensor (GloSensor-IRES-Rluc) were transiently transfected with pcDNA3 (control) or mCherry-Dyn1-K44E, AllStars Negative (ASN) siRNA (control) or CHC17 siRNA, or pretreated with DMSO (control) and 30  $\mu$ M Dyngo4a for 15 minutes. **a**, Effects of endocytic blockade on peak cAMP luminescence. The peak luminescence value normalized to the corresponding control Iso condition ( $n = 3$ , pcDNA3 vs Dyn1-K44E  $p = 0.0031$ ; ASN vs CHC17 siRNA  $p = 0.9861$ ; DMSO vs Dyngo4a  $p = 0.0023$ ; ordinary one-way ANOVA, Sidak's multiple comparisons test). **b**, Endocytic blockade by multiple methods reduces  $\beta$ 2AR-stimulated *PCK1* transcription. qRT-PCR was performed on cells untreated or treated with 100 nM Iso for two hours ( $n = 5$ , pcDNA3 vs Dyn1-K44E  $p < 0.0001$ ;  $n = 6$ , ASN vs CHC17 siRNA  $p < 0.0001$ ;  $n = 4$ , DMSO vs Dyngo4a  $p < 0.0001$ ; by ordinary one-way ANOVA, Sidak's multiple comparisons test). **c**, Endocytic blockade effects on  $\beta$ 2AR internalization. Three methods of endocytic inhibition are assayed by  $\beta$ 2AR internalization. Cells were untreated or treated with 100 nM Iso for 30 minutes ( $n = 5$ , pcDNA3 vs Dyn1-K44E,  $p = 0.0038$ ;  $n = 3$  ASN vs CHC17 siRNA,  $p < 0.0001$ ;  $n = 4$  DMSO vs Dyngo4a,  $p < 0.0001$  by ordinary one-way ANOVA, Sidak's multiple comparisons test). **d**, Images of endocytic blockade methods on  $\beta$ 2AR internalization. Cell surface  $\beta$ 2ARs were labeled using M1-FLAG-647. After 30 minutes of 100 nM Iso, cells were imaged by spinning disk confocal microscopy. Images of representative single slices are shown depicting the amount of  $\beta$ 2AR internalization after 30 minutes Iso. Scale bars = 5  $\mu$ m. **e**, GG4B response to multiple concentrations of forskolin. Cells transfected with the GG4B were imaged by spinning disk confocal microscopy and untreated (DMSO) or treated with 10  $\mu$ M, 1  $\mu$ M, 100 nM or 10 nM at Fsk 5 minutes. Area under the curve (right) shown for the quantification of the time series (left). ( $n \geq 3$ , cells  $\geq 18$  per biological replicate; DMSO vs 100 nM Fsk, DMSO vs 1  $\mu$ M Fsk, DMSO vs 10  $\mu$ M Fsk, 10  $\mu$ M Fsk vs 10 nM Fsk, 10  $\mu$ M Fsk vs 100 nM Fsk and 10  $\mu$ M Fsk vs 1  $\mu$ M Fsk  $p < 0.0001$ ; DMSO vs 10 nM Fsk  $p = 0.2406$ ; Sidak's multiple comparisons test, ordinary one-way ANOVA). **f**, GG4B cAMP fluorescence biosensor characterization *in vitro*. Cytoplasmic fraction prepared from HEK293 cells transiently expressing GG4B

was treated with 100  $\mu\text{M}$  IBMX, and different concentrations of cAMP. Fluorescence was recorded and the data were fit to a non-linear regression model (sigmoidal, 4PL). Data are from one independent experiment.

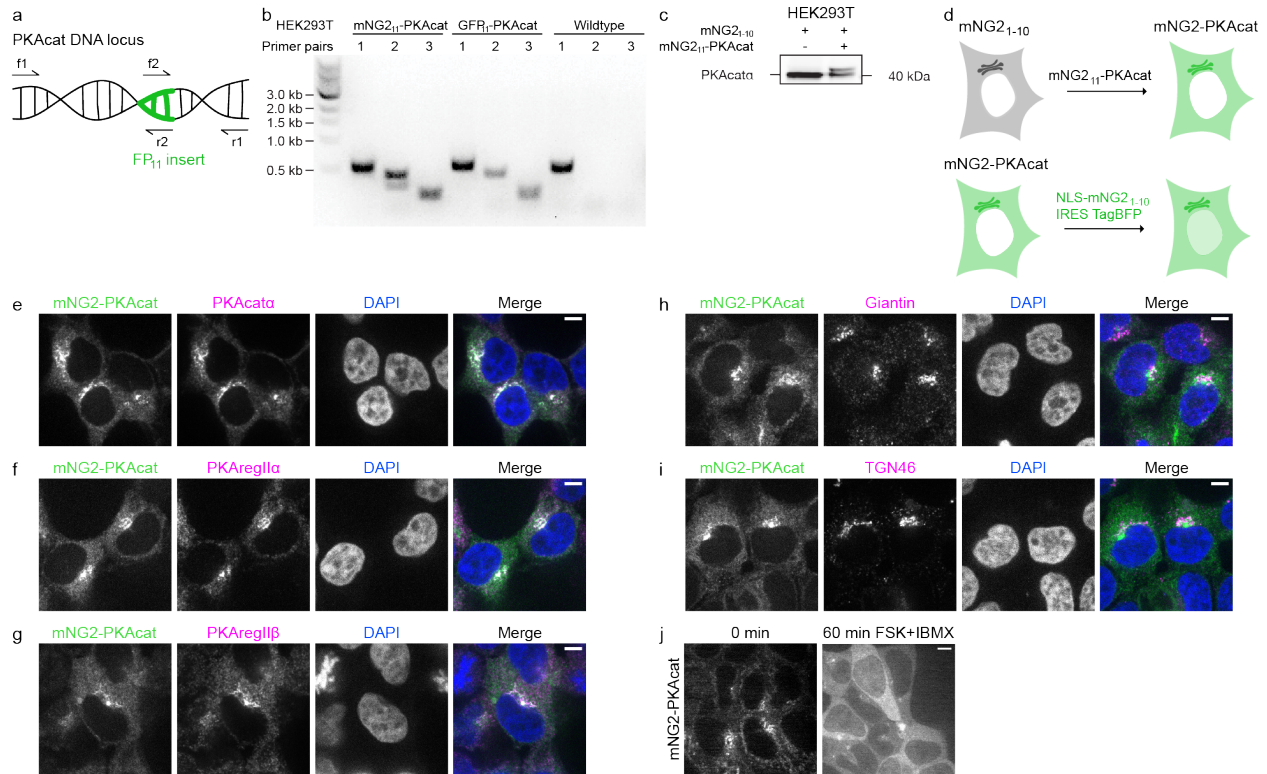

**Supplementary Figure 3.** Validation and characterization of HEK293T mNG2-PKAcat knock-in line. **a**, Cartoon explaining primer placement for PCR amplified fragments in **(b)**. Outer Forward primer (f1), Insert Forward primer (f2), Outer Reverse primer (r1) and Insert Reverse primer (r2). **b**, Gel verifying correct FP<sub>11</sub> insertion in knock-in cells. Fragments were PCR amplified from extracted genomic DNA. Comparison of PRKACA-mNG2<sub>11</sub>, PRKACA-GFP<sub>11</sub> and wild type HEK293T cells. Numbers in lanes indicate primer pairs used: [1] primers used f1 and r1, [2] primers used f1 and r2, [3] primers used f2 and r2. **c**, Western blot of cells expressing unlabeled and labeled PKAcat. PKAcat (~42 kDa) was probed in samples from HEK293T cells stably expressing mNG2<sub>1-10</sub> only or mNG2<sub>1-10</sub> and mNG2<sub>11</sub>-PKAcat. **d**, Cartoons of mNG2-PKAcat imaging strategies. PKAcat endogenously-tagged with mNG2<sub>11</sub> in a HEK293T cell line stably expressing mNG2<sub>1-10</sub> to detect cellular PKAcat (top). Cells co-expressing mNG2<sub>1-10</sub> and endogenously-tagged mNG2<sub>11</sub>-PKAcat are untransfected or transfected with nuclear localized NLS-mNG2<sub>1-10</sub> for detection of PKAcat in the nucleus (bottom). **e-i**, Representative images from fixed cell spinning disk confocal microscopy. mNG2-PKAcat cells were fixed and stained for DAPI and PKAcata (**e**), PKAregII $\alpha$  (**f**), and PKAregII $\beta$  (**g**), Giantin (**h**), TGN46 (**i**). **j**, Visualizing PKAcat in the nucleus by live imaging. Gene-edited cells expressing endogenous mNG2-PKAcat were untreated or treated with 10  $\mu$ M Fsk and 500  $\mu$ M IBMX and imaged after 60 minutes of treatment. Scale bars = 5  $\mu$ m.

HEK293T expressing mNG2[1-10]  
1: wildtype PKAcata  
2: mNG2[11]-PKAcata

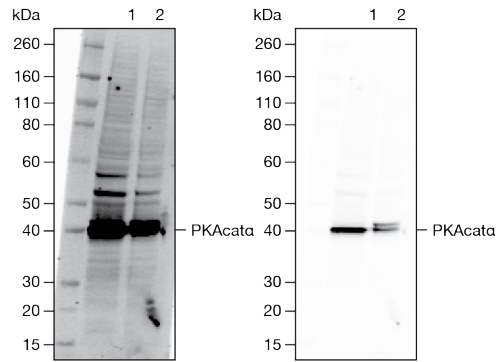

**Supplementary Figure 4.** Images of the same uncropped blot with different contrasts from Supplementary Fig. 3c.

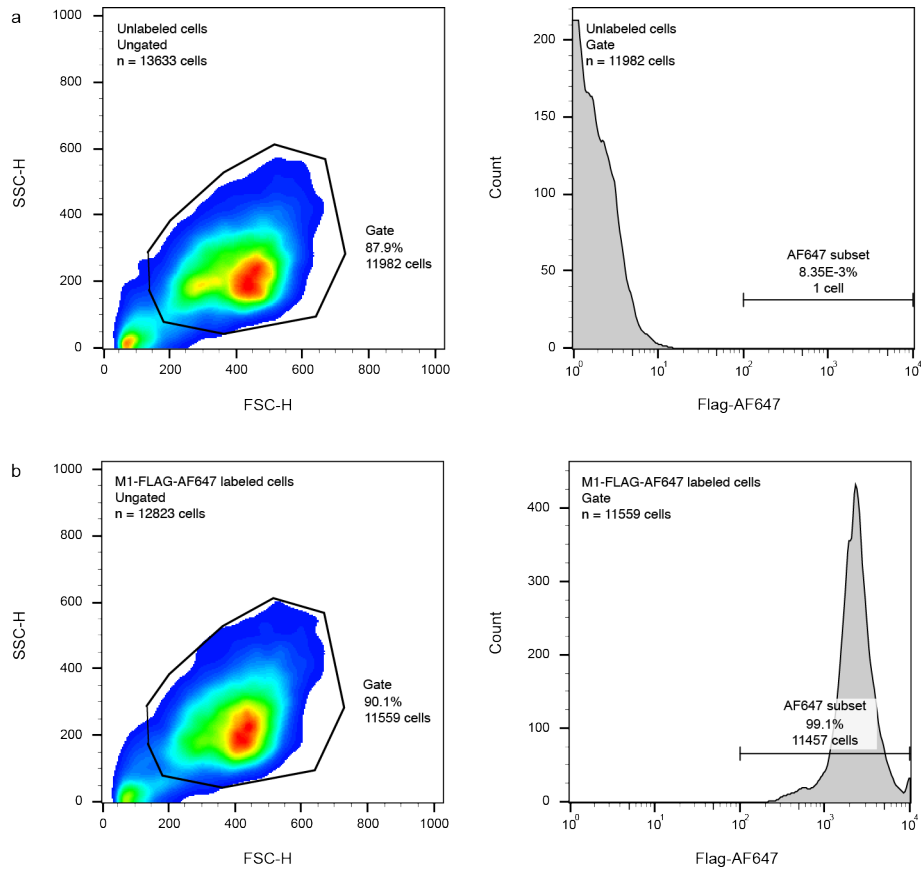

**Supplementary Figure 5.** Gating strategy for flow cytometry experiments to calculate  $\beta$ 2AR internalization. Gating strategy applied to **a**, unlabeled cells and **b**, M1-FLAG-AF647 labeled cells.

| Variable          | Reported value                             | Reference                                                |
|-------------------|--------------------------------------------|----------------------------------------------------------|
| D of GFP          | $\sim 30 \mu\text{m}^2\text{s}^{-1}$       | Swaminathan et al. 1997                                  |
| D of GFP          | $24 \mu\text{m}^2\text{s}^{-1}$            | Potma et al. 2001                                        |
| D of PKAcat       | $4.4 \mu\text{m}^2\text{s}^{-1}$           | Li et al. 2015                                           |
| $k_{\text{on}}$   | $5 \times 10^6 \text{M}^{-1}\text{s}^{-1}$ | Cheng et al. 2001                                        |
| $k_{\text{on}}$   | $5 \times 10^5 \text{M}^{-1}\text{s}^{-1}$ | Zawadzki et al. 2004                                     |
| [PKAreg]          | $2 \times 10^{-6} \text{M}$                | Walker-Gray et al. 2017                                  |
| [PKAcat]          | $2 \times 10^{-7} \text{M}$                | Walker-Gray et al. 2017                                  |
| $k_{\text{on}}^*$ | $1-10 \text{s}^{-1}$                       | $k_{\text{on}}^* = k_{\text{on}} \times [\text{PKAreg}]$ |

**Supplementary Table 1.** Table of known values of GFP and PKA for estimating lifetime ( $t$ ) and displacement ( $x$ ) in Supplementary Table 2.

| D ( $\mu\text{m}^2\text{s}^{-1}$ ) | $k_{\text{on}}^*$ ( $\text{s}^{-1}$ ) | t (s) | x ( $\mu\text{m}$ ) |
|------------------------------------|---------------------------------------|-------|---------------------|
| 30                                 | 10                                    | 0.1   | 3.46                |
| 24                                 | 10                                    | 0.1   | 3.1                 |
| 4.4                                | 10                                    | 0.1   | 1.33                |
| 30                                 | 1                                     | 1     | 10.95               |
| 24                                 | 1                                     | 1     | 9.8                 |
| 4.4                                | 1                                     | 1     | 4.2                 |

**Supplementary Table 2.** Estimation of PKAcat distance traveled before rebinding PKAreg based on diffusion coefficients, on rates and concentrations from Supplementary Table 1. Time constant for reassociation,  $t$ , defined by  $1/k_{\text{on}}^*$ . Distance,  $x$ , before rebinding is calculated from  $x = \sqrt{4Dt}$ .

| Locus  | sgRNA guide sequence                                               | Insert             | Donor DNA                                                                                                                                                                                                                                     |
|--------|--------------------------------------------------------------------|--------------------|-----------------------------------------------------------------------------------------------------------------------------------------------------------------------------------------------------------------------------------------------|
| PRKACA | TAATACGACTCACTATAGGC<br>GGCCGCCGCCGCCGCGATG<br>TTTAAGAGCTATGCTGGAA | mNG2 <sub>11</sub> | GGGGCCGCCGCCGCCGAGCCAGCACCCGCCG<br>CGCCGCAGCTCCGGGACCGGCCCCGGCCGCC<br>GCCGCCGCGATG <b>ACCGAGCTCAACTTCAAGG</b><br><b>AGTGGCAAAGGCCTTTACCGATATGATGGT</b><br>GGCGGCGGCAACGCCGCCGCCGCAAGAAGG<br>GCAGCGAGCAGGAGAGCGGTGAGTGCCCGGG<br>CTGTGACCCCGATC |
| PRKACA | TAATACGACTCACTATAGGC<br>GGCCGCCGCCGCCGCGATG<br>TTTAAGAGCTATGCTGGAA | GFP <sub>11</sub>  | GGGGCCGCCGCCGCCGAGCCAGCACCCGCCG<br>CGCCGCAGCTCCGGGACCGGCCCCGGCCGCC<br>GCCGCCGCGATG <b>CGTGACCACATGGTCTTC</b><br><b>ATGAGTATGTAATGCTGCTGGGATTACAGGT</b><br>GGCGGCGGCAACGCCGCCGCCGCAAGAAGG<br>GCAGCGAGCAGGAGAGCGGTGAGTGCCCGGG<br>CTGTGACCCCGATC |

**Supplementary Table 3.** List of DNA sequences used for knock-in cell line generation.

| Cell line                     | Outer Forward Primer                                                     | Outer Reverse Primer                                               | Insert Forward                                                            | Insert Reverse                                                            |
|-------------------------------|--------------------------------------------------------------------------|--------------------------------------------------------------------|---------------------------------------------------------------------------|---------------------------------------------------------------------------|
| PRKACA-<br>mNG2 <sub>11</sub> | CGCGAGCGAGTGAAT<br>GGCCGAGAGTCCGCG<br>GTGCGTGTCCCGAGG<br>CTGAGAGCCTATAGT | TAGGCAGAGAGGATG<br>AGGGGCCCGTAGG<br>GGGAGGGGCCAGGC<br>GATGATGGACAA | ACCGAGCTCAACT<br>TCAAGGAGTGGCA<br>AAAGGCCTTTACC<br>GATATGATGGGTG<br>GCGGC | GCCGCCACCCATC<br>ATATCGGTAAAGG<br>CCTTTTGCCACTCC<br>TTGAAGTTGAGCTC<br>GGT |
| PRKACA-<br>GFP <sub>11</sub>  | CGCGAGCGAGTGAAT<br>GGCCGAGAGTCCGCG<br>GTGCGTGTCCCGAGG<br>CTGAGAGCCTATAGT | TAGGCAGAGAGGATG<br>AGGGGCCCGTAGG<br>GGGAGGGGCCAGGC<br>GATGATGGACAA | CGTGACCACATGG<br>TCCTTCATGAGTAT<br>GTAAATGCTGCTG<br>GGATTACAGGTGG<br>CGGC | GCCGCCACCTGTA<br>ATCCCAGCAGCAT<br>TTACATACTCATGA<br>AGGACCATGTGGT<br>CACG |

**Supplementary Table 4.** List of PCR primers for knock-in cell line validation.



| Primer        | Sequence              |
|---------------|-----------------------|
| GAPDH forward | CTGCCCAAGATCTTCCATGT  |
| GAPDH reverse | GACAAGCTTCCC GTTCTCAG |
| PCK1 forward  | CTGCCCAAGATCTTCCATGT  |
| PCK1 reverse  | CAGCACCTGGAGTTCTCTC   |
| CHC17 forward | ACTTAGCCGGTGCTGAAGAA  |
| CHC17 reverse | AACCGACGGATAGTGTCTGG  |

**Supplementary Table 5.** List of qRT-PCR primers.

| Antibody                              | Manufacturer             | Catalog # | Dilution |
|---------------------------------------|--------------------------|-----------|----------|
| Rabbit anti PKAcat $\alpha$ (C-20)    | Santa Cruz Biotechnology | sc-903    | 1:1000   |
| Rabbit anti PKAreg II $\alpha$ (C-20) | Santa Cruz Biotechnology | sc-908    | 1:1000   |
| Mouse anti PKAreg II $\beta$ Clone 45 | BD Biosciences           | 610625    | 1:1000   |
| Mouse anti Giantin [9B6]              | Abcam                    | ab37266   | 1:1000   |
| Sheep anti TGN46                      | Bio-Rad                  | AHP500GT  | 1:1000   |
| Mouse anti EEA1 Clone 14              | BD Biosciences           | 610457    | 1:1000   |
| Donkey anti Mouse AlexaFluor 647      | Invitrogen               | A31571    | 1:500    |
| Goat anti Rabbit AlexaFluor 647       | Invitrogen               | A21245    | 1:500    |
| Donkey anti Sheep AlexaFluor 555      | Invitrogen               | A21436    | 1:500    |

**Supplementary Table 6.** List of antibodies used for immunofluorescence.

| Antibody                            | Manufacturer                | Catalog # | Dilution |
|-------------------------------------|-----------------------------|-----------|----------|
| Mouse anti CREB (86B10)             | Cell Signaling Technologies | 9104      | 1:2000   |
| Rabbit anti pCREB (S133) (87G3)     | Cell Signaling Technologies | 9198      | 1:2000   |
| Rabbit anti PKA C- $\alpha$         | Cell Signaling Technologies | 4782      | 1:2000   |
| Mouse anti HDAC2 (3F3)              | Cell Signaling Technologies | 5113      | 1:2000   |
| Mouse anti $\alpha$ -tubulin (DM1A) | Cell Signaling Technologies | 3873      | 1:10000  |
| IRDye 680RD Donkey anti-Mouse IgG   | LI-COR Biosciences          | 926-68072 | 1:10000  |
| IRDye 800CW Donkey anti-Rabbit IgG  | LI-COR Biosciences          | 926-32213 | 1:10000  |

**Supplementary Table 7.** List of antibodies used for western blots.

### Supplementary References

1. Swaminathan, R., Hoang, C. P. & Verkman, A. S. Photobleaching recovery and anisotropy decay of green fluorescent protein GFP-S65T in solution and cells: cytoplasmic viscosity probed by green fluorescent protein translational and rotational diffusion. *Biophys. J.* **72**, 1900–1907 (1997).
2. Potma, E. O. *et al.* Reduced protein diffusion rate by cytoskeleton in vegetative and polarized Dictyostelium cells. *Biophys. J.* **81**, 2010–2019 (2001).
3. Li, L., Gervasi, N. & Girault, J.-A. Dendritic geometry shapes neuronal cAMP signalling to the nucleus. *Nat. Commun.* **6**, 6319 (2015).
4. Cheng, X., Phelps, C. & Taylor, S. S. Differential binding of cAMP-dependent protein kinase regulatory subunit isoforms Ialpha and IIbeta to the catalytic subunit. *J. Biol. Chem.* **276**, 4102–8 (2001).
5. Zawadzki, K. M. & Taylor, S. S. cAMP-dependent protein kinase regulatory subunit type IIbeta: active site mutations define an isoform-specific network for allosteric signaling by cAMP. *J. Biol. Chem.* **279**, 7029–36 (2004).
6. Walker-Gray, R., Stengel, F. & Gold, M. G. Mechanisms for restraining cAMP-dependent protein kinase revealed by subunit quantitation and cross-linking approaches. *Proc. Natl. Acad. Sci.* **114**, 10414–10419 (2017).
