# Supplementary material
Source: PubMed Central journal article supplement (PMC8084946)
Supplement: NIHMS1666235-supplement-5.pdf [file NIHMS1666235-supplement-5.pdf]

7 January 2021

Dear MARK VONZASTROW,

Pursuant to the Open Access Policy adopted by UCSF Faculty on 21 May 2012, this communication serves to notify you that your request for a waiver of the open access license for "Spatial decoding of endosomal cAMP signals by a metastable cytoplasmic PKA network" to be published in Nature Chemical Biology has been granted.

However, please be aware that waiver of the application of the open access (OA) license to your article as specified above does not affect public access requirements from funders such as government agencies. If the article is subject to the 2008 NIH Public Access Policy, any policy developed as a result of the 2013 White House Office of Science and Technology Policy memorandum, or any other funder requirements, those obligations cannot be waived. You must be sure to reserve rights sufficient to comply with any funder policies when you enter into a publication agreement for the article.

Independent of the waiver, the UCSF Senate OA Policy still requires that the author's final version of your article be deposited for preservation in eScholarship, the UC repository. Articles deposited for preservation, for which a waiver has been obtained, will not be publicly displayed.

Although you have received a waiver of the OA license, the publisher's agreement may provide sufficient rights to allow copies of your article to be made publicly available in eScholarship. In some cases, the UC Libraries have negotiated this right with publishers separate from the agreement between the author and the publisher. The publisher may ask that certain conditions be met, some of which the repository can easily accommodate (for example, an embargo period during which the article will not be made publicly available). The bibliographic information will be made available for harvesting and indexing by search engines, such as Google Scholar, creating increased awareness of your article.

If you have any questions about the UCSF Open Access Policy, the waiver of the open access license, or depositing your article in the UC repository, please contact [oapolicy@ucsf.edu](mailto:oapolicy@ucsf.edu).

Sincerely,



Keith Mostov  
Professor  
Chair, UCSF Committee on Library and  
Scholarly Communication (COLASC)



Christopher Shaffer  
University Librarian  
Assistant Vice Chancellor
