# Supplementary material
Source: PubMed Central journal article supplement (PMC8084946)
Supplement: NIHMS1666235-supplement-6.pdf [file NIHMS1666235-supplement-6.pdf]

# nature chemical biology

## Policy and Formatting Worksheet

CORRESPONDING AUTHOR: Mark von Zastrow

MS NUMBER: NCHEMB-A191210570B

MS TYPE: Article

### Instructions:

- Review each point
- Initial for completion
- If required, ensure that there is an appropriate statement in the body of your paper
- Upload the completed and signed worksheet along with other required documents as separate files with your final submission. Please note that certain forms may require a physical signature. Submitting a digitally signed form may delay acceptance.

Please note that failure to provide the requested documents and information will delay acceptance and publication of your paper. For additional guidance, please contact our editorial assistant at [chembio@us.nature.com](mailto:chembio@us.nature.com).

| POLICY REQUIREMENTS                                                                                                                                                                                                                                                                                                                                                                                                                                                                                                                                                                                                                                                                                                                                                                                                                                                                                                                                                                                                                          |                                 |
|----------------------------------------------------------------------------------------------------------------------------------------------------------------------------------------------------------------------------------------------------------------------------------------------------------------------------------------------------------------------------------------------------------------------------------------------------------------------------------------------------------------------------------------------------------------------------------------------------------------------------------------------------------------------------------------------------------------------------------------------------------------------------------------------------------------------------------------------------------------------------------------------------------------------------------------------------------------------------------------------------------------------------------------------|---------------------------------|
| PERMISSION TO PUBLISH                                                                                                                                                                                                                                                                                                                                                                                                                                                                                                                                                                                                                                                                                                                                                                                                                                                                                                                                                                                                                        | Author Confirmation             |
| <p><b>Before we can move ahead with acceptance and publication of your paper we must receive formal written permission use, edit, publish and distribute your work.</b></p> <p>You will retain copyright your paper, but you are granting Nature Research certain rights and permissions for the full term of copyright and any extension thereto, as outlined in the License to Publish form.</p> <p><b>Please complete, sign, and return the form linked below.</b> We cannot accept “e-signatures” on any legal document, so please return the form with a handwritten signature, or an embedded image of a handwritten signature. <b>All legal forms must be signed by the corresponding author.</b></p> <p>List all contributing authors on the License to Publish. If you cannot fit the names in the provided field, please instead write “see attached page” and include a second page with the full author list.</p> <p><a href="http://www.nature.com/documents/sna-ltp.docx">http://www.nature.com/documents/sna-ltp.docx</a></p> | <p>Author Initial __mz_____</p> |

| COLOR CHARGES                                                                                                                                                                                                                                                                                                                                                                                                                                                                                                                                                                                                                                                                                                                                                                                                                                                                                                                                                                                                                  | Author Confirmation                                                                                                                |
|--------------------------------------------------------------------------------------------------------------------------------------------------------------------------------------------------------------------------------------------------------------------------------------------------------------------------------------------------------------------------------------------------------------------------------------------------------------------------------------------------------------------------------------------------------------------------------------------------------------------------------------------------------------------------------------------------------------------------------------------------------------------------------------------------------------------------------------------------------------------------------------------------------------------------------------------------------------------------------------------------------------------------------|------------------------------------------------------------------------------------------------------------------------------------|
| <p>We are committed to providing authors with the highest quality figures. In order to cover part of the additional cost of four-color reproduction, we charge authors a fee of €360/ £320/ \$430 per color figure. There are no additional submission fees or page charges.</p> <p>Please complete and sign <a href="#">this form</a> so that we can process your payment your figures.</p>                                                                                                                                                                                                                                                                                                                                                                                                                                                                                                                                                                                                                                   | <p>Author Initial ___mz_____</p>                                                                                                   |
| COMPETING INTEREST STATEMENTS (CI)                                                                                                                                                                                                                                                                                                                                                                                                                                                                                                                                                                                                                                                                                                                                                                                                                                                                                                                                                                                             | Author Confirmation                                                                                                                |
| <p>Nature Research defines <b>Competing Interest (CI)</b> as financial and non-financial interests (including but not limited to funding, employment, stocks, shares, patents, personal or professional relationships with individuals or institutions, unpaid membership advocacy) that could or could be perceived to directly undermine the objectivity, integrity and value of a publication, or could be seen as having an influence on the judgments and actions of authors with regard to objective data presentation, analysis and interpretation.</p> <p>Please thoroughly review our <a href="#">policy</a> on Competing Interests and include a detailed statement in your final manuscript file, <u>and</u> in our manuscript tracking system. Please ensure the statements are identical in both. Be specific about how each point stated relates to the research, list applicable author initials, and/or patent numbers.</p> <p>If there are no competing interests, a negative statement must be included.</p> | <p>Author Initial ___mz_____</p>                                                                                                   |
| LIFE SCIENCES REPORTING CHECKLISTS                                                                                                                                                                                                                                                                                                                                                                                                                                                                                                                                                                                                                                                                                                                                                                                                                                                                                                                                                                                             | Author Confirmation                                                                                                                |
| <p>Please ensure that you have completed the Life Sciences Reporting Summary and Editorial Policy Checklist in as much detail as possible. <b>Return a current version of the checklists with your final.</b></p> <p>More information on Nature Research’s initiative to improve our transparency standards and increase reproducibility of published results can be found <a href="#">here</a>.</p> <p><b>Blank copies of these forms are here:</b></p> <p><a href="#">Reporting Summary</a></p> <p><a href="#">Editorial Policy Checklist</a></p>                                                                                                                                                                                                                                                                                                                                                                                                                                                                            | <p>Author Initial ___mz_____</p>                                                                                                   |
| AUTHOR LIST CONFIRMATION                                                                                                                                                                                                                                                                                                                                                                                                                                                                                                                                                                                                                                                                                                                                                                                                                                                                                                                                                                                                       | Author Confirmation                                                                                                                |
| <p>Please review your complete author list to verify that it is complete and accurate and initial below. We ask that you consult with your coauthors to ensure that all names, affiliations, and titles are represented correctly. Please note that if any authors are added or removed after this point then all authors will be requested to provide approval documentation that could potentially delay the production of your paper.</p> <p>Author list: Grace E. Peng, Veronica Pessino, Bo Huang, and Mark von Zastrow</p>                                                                                                                                                                                                                                                                                                                                                                                                                                                                                               | <p><b>I hereby certify that I have verified the author listed as presented in this paper.</b></p> <p>Author Initial ___mz_____</p> |
| FUNDING SUPPORT CONFIRMATION                                                                                                                                                                                                                                                                                                                                                                                                                                                                                                                                                                                                                                                                                                                                                                                                                                                                                                                                                                                                   | Author Confirmation                                                                                                                |

|                                                                                                                                                                                                                                                                                                                                                                                                                                                                                                                                                                                                                                               |                                                                                                                                                         |
|-----------------------------------------------------------------------------------------------------------------------------------------------------------------------------------------------------------------------------------------------------------------------------------------------------------------------------------------------------------------------------------------------------------------------------------------------------------------------------------------------------------------------------------------------------------------------------------------------------------------------------------------------|---------------------------------------------------------------------------------------------------------------------------------------------------------|
| <p>If any listed authors received grants or funding then that information must be provided. <b>Please list each grant number, followed by the initials of the author who received it, in the Acknowledgements section of your paper.</b></p>                                                                                                                                                                                                                                                                                                                                                                                                  | <p><b>I hereby certify that I have listed all applicable funding sources in accordance with NRG's funding mandates.</b><br/>Author Initial ___mz___</p> |
| <p><b>OPEN ACCESS WAIVER</b></p>                                                                                                                                                                                                                                                                                                                                                                                                                                                                                                                                                                                                              | <p><b>Author Confirmation</b></p>                                                                                                                       |
| <p>We note that one or more authors is from one or more of the following institutions:</p> <ul style="list-style-type: none"> <li>• <a href="#">University of California, San Francisco (UCSF)</a></li> </ul> <p>We understand that these authors are subject to their institutions' respective open access policies and we will need you to provide us with a waiver from the institution of every affected author on the manuscript. <b>Please collate all waivers and return them with your final submission.</b></p> <p>More information on Nature Research's compliance with Open Access mandates can be found <a href="#">here</a>.</p> | <p>Author Initial ___mz___</p>                                                                                                                          |
| <p><b>THIRD-PARTY RIGHTS AND REUSE PERMISSIONS</b></p>                                                                                                                                                                                                                                                                                                                                                                                                                                                                                                                                                                                        | <p><b>Author Confirmation</b></p>                                                                                                                       |
| <p><b>You must obtain the right to use any figures, tables, images, videos or text boxes that are reproduced (or adapted) from material that you do not own. You also must give proper attribution to the creators of that work. This includes work that has previously been published elsewhere.</b></p> <p>If you do not own any such item (in whole or part) that is included in your paper, you must complete and return a <a href="#">Third Party Rights Table BH</a>.</p> <p>If you have any questions please contact our Editorial Assistant at <a href="mailto:chembio@us.nature.com">chembio@us.nature.com</a></p>                   | <p>Author Initial ___mz___</p>                                                                                                                          |

**FORMATTING REQUIREMENTS: Author; please initial for confirmation of ALL points below \_\_\_\_\_**

**MAIN TEXT**

**The main text file and associated tables must be submitted in Microsoft Word format.**

All manuscripts **must** include the following sections, ordered as listed:

- Title
- Author List and affiliations
- Abstract
- Introduction
- Results (with Subheadings)
- Discussion
- Acknowledgements
- Author Contributions
- Competing Financial Interests Statement
- References (for main text *only*)
- Figure legends (for main text *only*)
- Tables (note: tables should be pasted into Word files as editable tables, not as images)
- Online Methods
- Data Availability Statement

- Code Availability Statement (*only* if new or custom code/algorithms/software were developed as part of the work)
- Methods-only References

Please do **not** embed figures in word files (See Figure Formatting Guidelines below). Large tables that cannot be comfortably incorporated into the manuscript text may be submitted as Supplementary Tables if necessary.

### Author List and Affiliations

Please arrange your cover page so the information appears in the following order:

- Title
- Author List
- Institutions
- Present addresses
- Equal contributions statement
- Corresponding author statement.

Please ensure that you have approved your final author list as requested above.

**ORCID information.** Springer Nature journals are committed to improving transparency in authorship and support the [Open Researcher and Contributor Identifier \(ORCID\)](#) initiative, which helps the scientific community achieve unambiguous attribution of all scholarly contributions. We require that all ‘corresponding authors’ on the paper create and link their ORCID information with their account on the Manuscript Tracking System (MTS) prior to acceptance. Non-corresponding authors do not have to link their ORCIDs but are encouraged to do so. Please follow the instructions below to link your ORCID to your account on our MTS before submitting the final version of the manuscript. If you do not yet have an ORCID you will be able to [create one in minutes](#). If you have any issues attaching an ORCID identifier to your MTS account, please contact [Platform Support](#).

**IMPORTANT:** It is not possible to add or modify ORCIDs during the proofing process. All authors who are required or wish to include ORCIDs must follow the procedure above prior to acceptance. To support ORCID's aims, we only allow a single ORCID identifier to be attached to one account

**Consortium authorship.** For papers containing one or more consortia, all members of the consortium who contributed to the paper must be listed in the paper (i.e., print/online PDF). If necessary, individual authors can be listed in both the main author list and as a member of a consortium listed at the end of the paper. When submitting your revised manuscript via the online submission system, the consortium name should be entered as an author, together with the contact details of a nominated consortium representative. See <https://www.nature.com/authors/policies/authorship.html> for our authorship policy and <https://www.nature.com/documents/nr-consortia-formatting.pdf> for further consortia formatting guidelines, which should be adhered to prior to acceptance.

#### Affiliations:

- Please denote affiliations with superscript numbers rather than an asterisk, etc. Numbers appear in numerical order in the author list. Please do not group by institutions.
- Only one institution (and department) is allowed per affiliation number. If there is more than one department per institution, please separate them into different numbered affiliations.
- **Please do not provide full mailing addresses.** Please include only department; institution name; city; unabbreviated US state, Canadian province or Australian state if applicable; and country. Please be sure to relist this information at each occurrence of an affiliation.
- **Please indicate corresponding author and provide e-mail address**

### Acknowledgements and Contributions

#### Acknowledgements:

- Refer to individuals by first initial and last name, without titles or affiliations
- Provide affiliations for those who have supplied materials (cell lines, antibodies, etc.)

**Contributions:**

- Please keep your Author Contributions statement as concise as possible, while specifying individual contributions of each coauthor as precisely as possible.

Example: "A.P.M. contributed Y and Z; B.T.R. performed experiments Y and W," etc.

- Please ensure that author initials listed match the author list
- Distinguish authors with the same initials in some way

Example: "J. Doe contributed Y and Z; J. Dee contributed Y and W," etc.

**FIGURE FILES**

**Each complete figure must be submitted individually. AI, EPS, or PDF files are preferred. See attached Figure Guidelines PDF for additional information.**

**Do not submit flat files without editable layers intact.**

**Please ensure that:**

- Graphical data in all figures have error bars, if applicable, and definition of the error bars (i.e. s.e.m. or s.d.)
- All photographic images have scale bars (rather than numerical descriptions of magnification), as applicable.
- Figures are provided in RGB color mode. Note that if this is not possible the colors may appear somewhat differently in the published articles
- Panel labels are placed on top of images
- If chemical structures appear within the main figures or the Graphical Abstract, please upload original ChemDraw (CDX) files in addition to figure files
  - Please use our journal [ChemDraw template](#). Creating molecules within or copying them into the template will ensure that most of our journal style points are followed.
  - For more information, please review our [Chemical Style Guide](#).

**Figure Integrity:**

Please pay close attention to our [Digital Image Integrity Guidelines](#) and to the following points below:

- That unprocessed scans are clearly labelled and match the gels and western blots presented in figures.
- That control panels for gels and western blots are appropriately described as loading on sample processing controls.
- All images in the paper are checked for duplication of panels and for splicing of gel lanes.

Finally, please ensure that you retain unprocessed data and metadata files after publication — ideally archiving data in perpetuity —because these may be requested during the peer-review and production process or after publication if any issues arise.

**Graphical Abstract: Please see last page of attached figure guidelines PDF**

Please submit a Graphical Abstract that will be published alongside the title of the article.

- The GA should convey the major point(s) of the article in a simple, accessible format
- Size to fit imagery inside a 9 cm wide x 5 cm high rectangle
- Color images are encouraged and will be published at no additional charge

**CHEMICAL COMPOUNDS**

Please review our requirements for [characterization of chemical and biological materials](#) and ensure that your final submission adheres to these guidelines. Please report the source and purity of all purchased chemical compounds that are essential to the study.

**Nomenclature**

- Use common names for familiar chemical compounds (e.g., adenosine 5'-triphosphate or L-arginine) and natural products (e.g., neomycin).
- Refer to drugs with their generic name.

- Include stereochemical nomenclature (e.g., d-ribose or (2S,3R)-tartaric acid) where appropriate.

**Stereochemistry**

For chiral centers or ring fusions, stereochemistry should be indicated with wedges and dashes. Racemic mixtures or undetermined stereochemistry should be shown explicitly in the structure with a wavy line bond.

**SUPPLEMENTARY INFORMATION**

**See attached Inventory of Supporting Information. Instructions are included. Complete and upload with your final files.**

Unless otherwise stated please limit individual file sizes to approximately 30MB. We strongly encourage the use of repositories for large datasets or source data due to size considerations.

**Supplementary Videos**

Please cite all supplementary videos as "videos," not as "movies."

- .MOV format is preferred

Size your videos to 1,280 x 768 pixels or other aspect ratio with similar height or width.

I hereby certify that I have reviewed and verified all points requested to the best of my ability and have included all required

Mark v Zestrow

documentation with my final submission. SIGNED: \_\_\_\_\_

\_\_\_\_\_
